# Supplementary material for: On the saliva proteome of the Eastern European house mouse (Mus musculus musculus) focusing on sexual signalling and immunity
Source: PubMed Central journal article supplement (PMC5006050; doi:10.1038/srep32481), 2016-08-31
Supplement: srep32481-s1.pdf [file srep32481-s1.pdf]

# On the saliva proteome of the Eastern European house mouse (*Mus musculus musculus*) focusing on sexual signalling and immunity

Pavel Stopka\*, Barbora Kuntová, Petr Klempt, Leona Havrdová, Martina Černá, & Romana Stopková

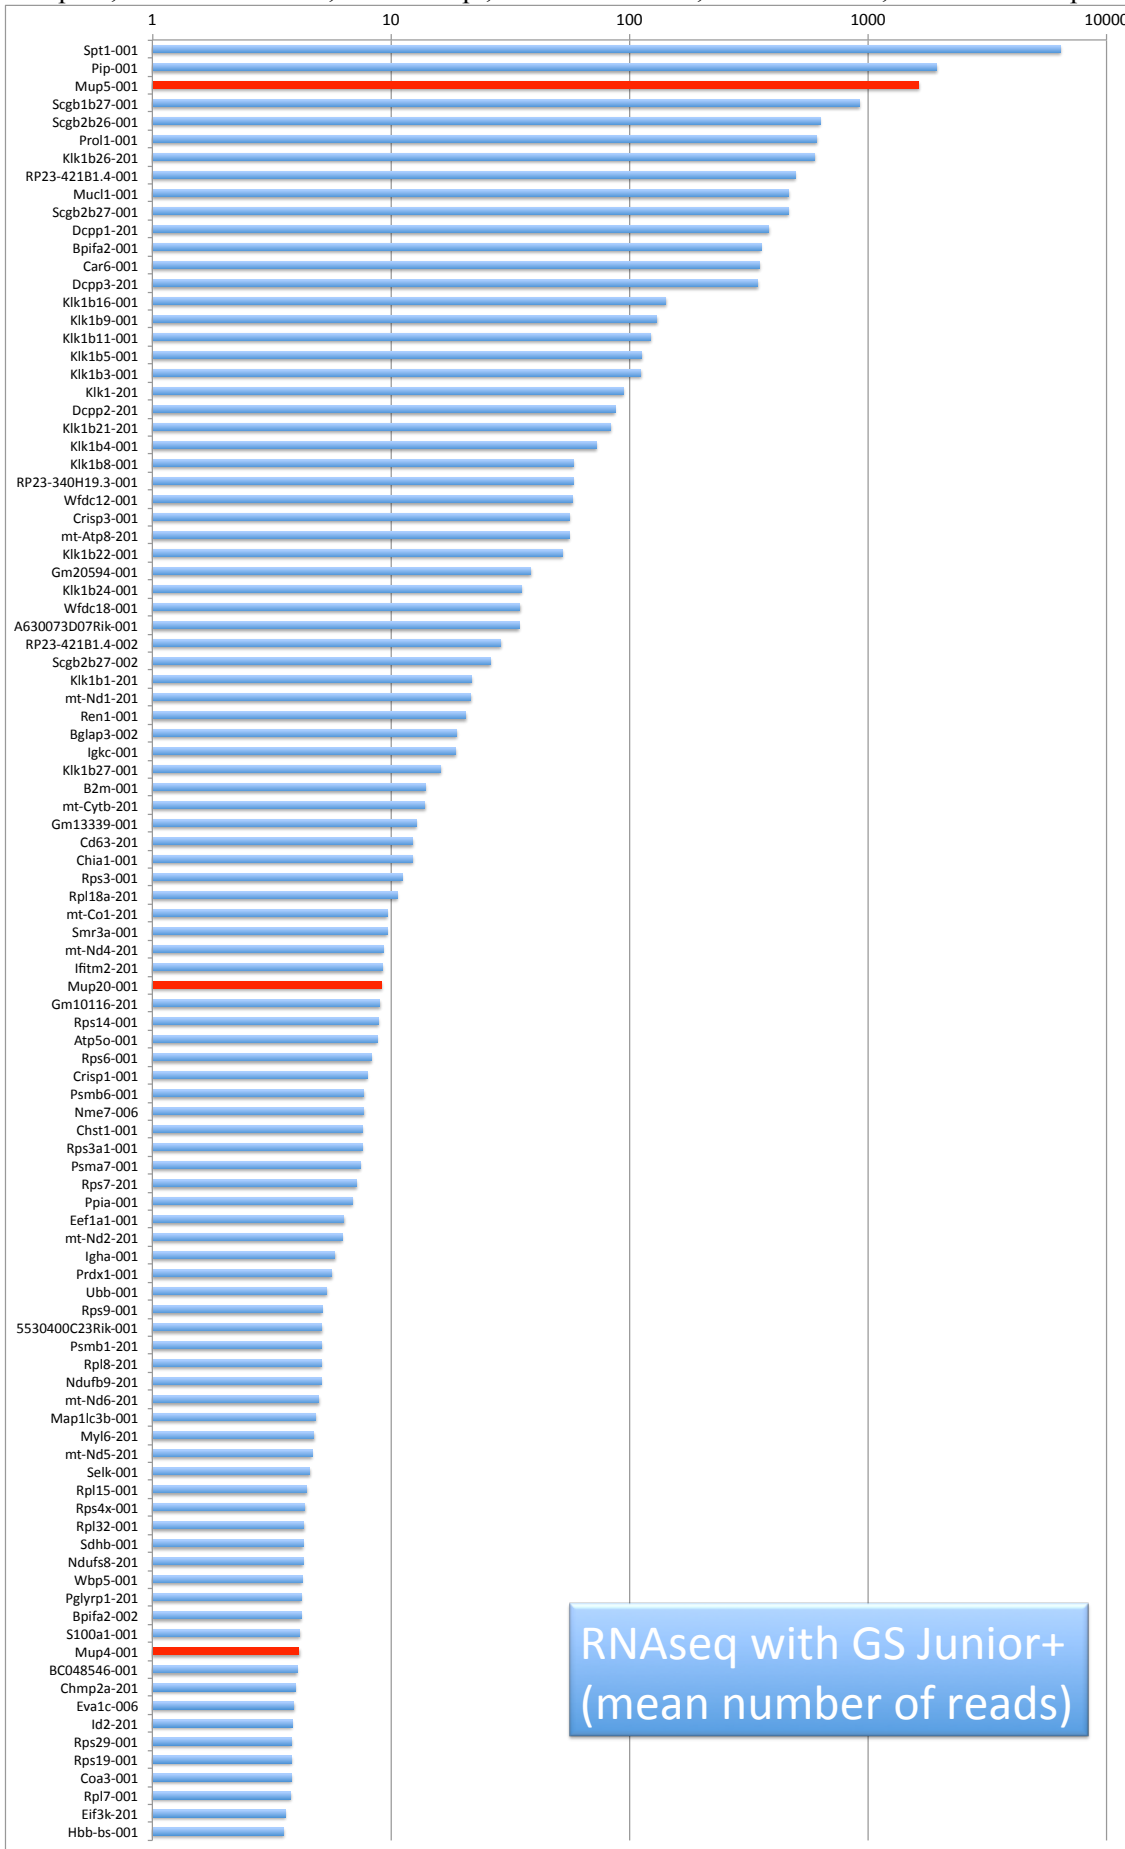

RNAseq with GS Junior+  
(mean number of reads)
